# Supplementary material
Source: PubMed Central journal article supplement (PMC3271908)
Supplement: 1115307109_pnas.1115307109_SI.pdf [file 1115307109_pnas.1115307109_SI.pdf]

# Supporting Information

Qian et al. 10.1073/pnas.1115307109

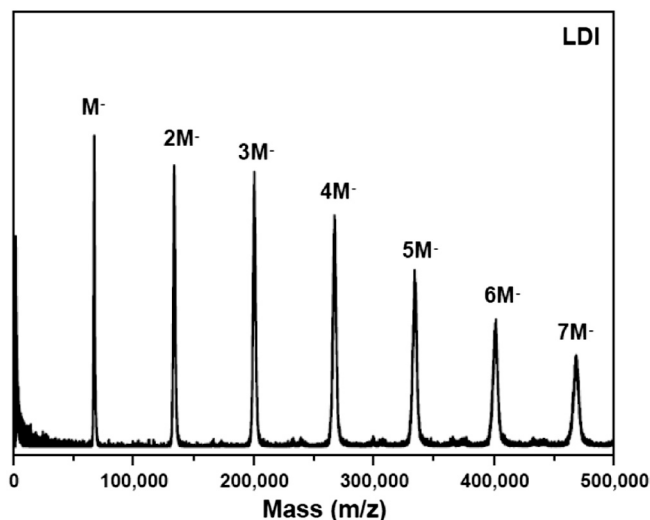

Fig. S1. Laser desorption ionization (LDI) mass spectrum of  $\text{Au}_{333}(\text{SR})_{79}$  nanoparticles in the range of 500 to 500,000 Da.

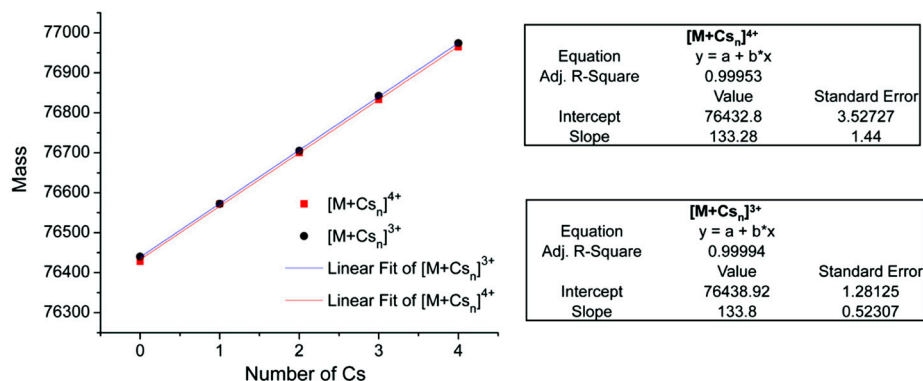

Fig. S2. Linear fittings of the ESI-MS peaks of  $\text{Au}_{333}(\text{SR})_{79}$  nanoparticles. In both 4+ and 3+ ion sets, the slope of 133.28 or 133.8 corresponds to the atomic mass of Cs (standard value: 133). The intercept, 76,432.8 (standard deviation  $\sigma = \pm 3.5$ ) or 76438.9 ( $\sigma = \pm 1.28$ ), is the molecular mass of the nanoparticle. The lower mass  $[\text{M}\text{Cs}_x]^{4+}$  set offers a higher accuracy, thus, we take this set to determine the molecular mass of the nanoparticle,  $M = 76,432.8 \pm 3.5$  Da.

**Table S1. The formulas corresponding to the TGA-determined organic wt% of 14.5 (allowed to fluctuate  $\pm 0.5$  in order to expand the search range for the formula)**

| Number of Au | Number of SR | Calculated Mass (Da) | Deviation from experiment (Da) | Calculated Organic wt% | Deviation from experiment (wt%) |
|--------------|--------------|----------------------|--------------------------------|------------------------|---------------------------------|
| 328          | 84           | 76,131.6             | -301.2                         | 15.1                   | 0.6                             |
| 328          | 85           | 76,268.8             | -164.0                         | 15.3                   | 0.8                             |
| 328          | 86           | 76,406.1             | -26.7                          | 15.4                   | 0.9                             |
| 328          | 87           | 76,543.3             | 110.5                          | 15.6                   | 1.1                             |
| 328          | 88           | 76,680.5             | 247.7                          | 15.7                   | 1.2                             |
| 329          | 83           | 76,191.3             | -241.5                         | 14.9                   | 0.4                             |
| 329          | 84           | 76,328.5             | -104.3                         | 15.1                   | 0.6                             |
| 329          | 85           | 76,465.7             | 32.9                           | 15.2                   | 0.7                             |
| 329          | 86           | 76,603.1             | 170.3                          | 15.4                   | 0.9                             |
| 329          | 87           | 76,740.3             | 307.5                          | 15.5                   | 1.0                             |
| 330          | 81           | 76,113.9             | -318.9                         | 14.6                   | 0.1                             |
| 330          | 82           | 76,251.1             | -181.7                         | 14.7                   | 0.2                             |
| 330          | 83           | 76,388.3             | -44.5                          | 14.9                   | 0.4                             |
| 330          | 84           | 76,525.5             | 92.7                           | 15.1                   | 0.6                             |
| 330          | 85           | 76,662.7             | 229.9                          | 15.2                   | 0.7                             |
| 331          | 80           | 76,173.7             | -259.1                         | 14.4                   | -0.1                            |
| 331          | 81           | 76,310.9             | -121.9                         | 14.6                   | 0.05                            |
| 331          | 82           | 76,448.1             | 15.3                           | 14.7                   | 0.2                             |
| 331          | 83           | 76,585.3             | 152.5                          | 14.9                   | 0.4                             |
| 331          | 84           | 76,722.5             | 289.7                          | 15.0                   | 0.5                             |
| 332          | 78           | 76,096.1             | -336.7                         | 14.1                   | -0.4                            |
| 332          | 79           | 76,233.3             | -199.5                         | 14.2                   | -0.3                            |
| 332          | 80           | 76,370.5             | -62.3                          | 14.4                   | -0.1                            |
| 332          | 81           | 76,507.8             | 75.0                           | 14.5                   | 0.01                            |
| 332          | 82           | 76,645.0             | 212.2                          | 14.7                   | 0.2                             |
| 333          | 77           | 76,155.9             | -276.9                         | 13.9                   | -0.6                            |
| 333          | 78           | 76,293.1             | -139.7                         | 14.0                   | -0.5                            |
| <b>333</b>   | <b>79</b>    | <b>76,430.3</b>      | <b>-2.5</b>                    | <b>14.2</b>            | <b>-0.3</b>                     |
| 333          | 80           | 76,567.5             | 134.7                          | 14.3                   | -0.2                            |
| 333          | 81           | 76,704.8             | 272.0                          | 14.5                   | -0.02                           |
| 334          | 76           | 76,215.6             | -217.2                         | 13.7                   | -0.8                            |
| 334          | 77           | 76,352.9             | -79.9                          | 13.8                   | -0.7                            |
| 334          | 78           | 76,490.1             | 57.3                           | 14.0                   | -0.5                            |
| 334          | 79           | 76,627.3             | 194.5                          | 14.1                   | -0.4                            |
| 335          | 75           | 76,275.4             | -157.4                         | 13.5                   | -1.0                            |
| 335          | 76           | 76,412.6             | -20.2                          | 13.6                   | -0.9                            |
| 335          | 77           | 76,549.8             | 117.0                          | 13.8                   | -0.7                            |

Note that the  $m/z \sim 19,107$  being the monoadduct of  $[\text{MCs}_1]^{4+}$  can be ruled out by taking into consideration the result of thermogravimetric analysis. Should the  $m/z \sim 19,107$  peak be  $[\text{M-Cs}_1]^{4+}$ , then the molecular mass =  $19,107 \times 4 - 133 = 76,295$ . From the above table, one finds a matched formula of  $\text{Au}_{333}(\text{SR})_{78}$  (theoretical mass: 76,293), but the calculated weight loss (14.0%) is too much deviated from the experimental value of 14.5%. The 0.5% deviation falls out of the error range of TGA ( $< \pm 0.3\%$ ).

**Table S2. The calculated  $n$ th zeros of spherical Bessel functions  $j_{l+1/2}(\beta r)$  of the first kind**

|          | $l = 0$ | $l = 1$ | $l = 2$ | $l = 3$ | $l = 4$ | $l = 5$ | $l = 6$ | $l = 7$ | $l = 8$ | $l = 9$ | $l = 10$ | $l = 11$ | $l = 12$ |
|----------|---------|---------|---------|---------|---------|---------|---------|---------|---------|---------|----------|----------|----------|
| 0th zero | 3.14    | 4.49    | 5.76    | 6.99    | 8.18    | 9.36    | 10.5    | 11.66   | 12.79   | 13.91   | 15.0     | 16.14    | 17.25    |
| 1st zero | 6.28    | 7.73    | 9.09    | 10.4    | 11.7    | 13.0    | 14.2    | 15.43   | 16.64   | 17.84   | 19.0     | 22.20    | 21.37    |
| 2nd zero | 9.42    | 10.9    | 12.3    | 13.7    | 15.0    | 16.4    | 17.6    | 18.92   | 20.18   | 21.43   | 22.66    | 23.89    | 25.10    |
| 3rd zero | 12.6    | 14.1    | 15.5    | 16.9    | 18.3    | 19.7    | 21.0    | 22.30   | 23.59   | 24.87   | 26.14    | 27.40    | 28.65    |
| 4th zero | 15.7    | 17.2    | 18.7    | 20.1    | 21.5    | 22.9    | 24.3    | 25.60   | 26.93   | 28.24   | 29.53    | 30.82    | 32.1     |
| 5th zero | 18.8    | 20.4    | 21.9    | 23.3    | 24.7    | 26.1    | 27.5    | 28.87   | 30.22   | 31.55   | 32.87    | 34.18    | 35.48    |
| 6th zero | 22.0    | 23.5    | 25.0    | 26.5    | 27.9    | 29.3    | 30.7    | 32.11   | 33.47   | 34.83   | 36.17    | 37.50    | 38.81    |

According to these  $\alpha_{n,l}$  values, electron orbitals are constructed, for example, the smallest  $\alpha_{n,l}$  is 3.14 for  $(n,l) = (0,0)$ , labeled 1s in analogy with atomic orbital, the next  $\alpha_{n,l}$  value is 4.49 for  $(n,l) = (0,1)$ , labeled 1p, and so on. The as-constructed orbitals are as follows:

1s, 1p, 1d, 2s, 1f, 2p, 1g, 2d, 1h, 3s, 2f, 1i, 3p, 1j, 2g, 3d, 4s, 1k, 2h, 3f, 1l, 4p .....
